# Supplementary material for: Diurnal evolution of non-precipitating marine stratocumuli in an LES ensemble
Source: Copernicus journal article supplement (doi:10.5194/egusphere-2024-1033), 2024-04-11
Supplement: Supplementary file 1 [file egusphere-2024-1033-supplement.pdf]

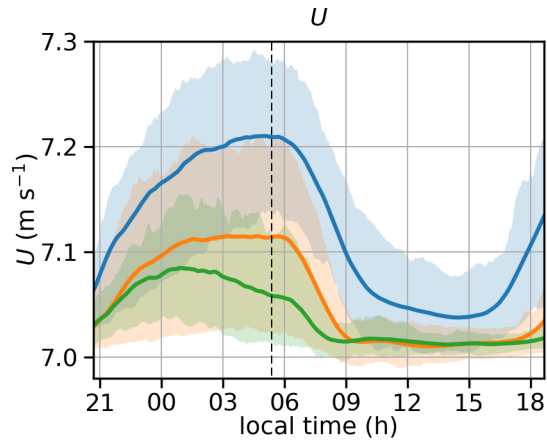

**Figure S1.** Same as Figure 4 but for the wind speed used for surface flux calculation ( $U$ ). See Figure 4 for legends.

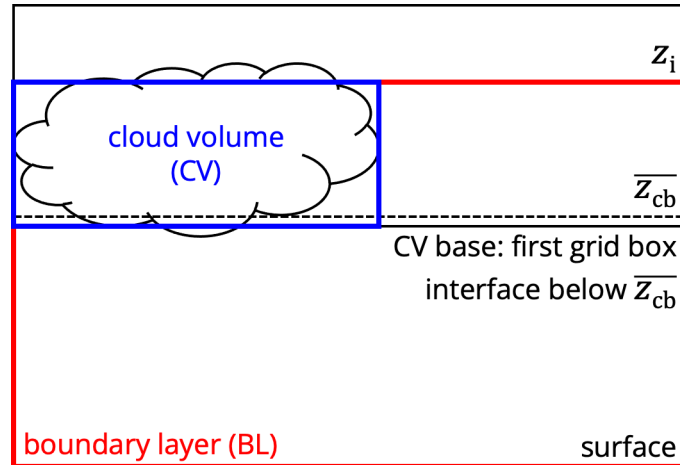

**Figure S2.** A sketch showing the definition of a cloud volume for budget analysis.
